# Supplementary material for: Cardiovascular Health, Race, and Decline in Cognitive Function in Midlife Women: The Study of Women's Health Across the Nation
Source: PubMed Central journal article supplement — J Am Heart Assoc. 2024 Apr 24;13(9):e031619. doi: 10.1161/JAHA.123.031619 (PMC11179880; doi:10.1161/jaha.123.031619), 2024-04-24

# **SUPPLEMENTAL MATERIAL**

**Table S1. Comparison of included and excluded women.**

|                                     | Missing<br>(Included,<br>Excluded) | Total             | Included          | Excluded          | P-value |
|-------------------------------------|------------------------------------|-------------------|-------------------|-------------------|---------|
| N (%)                               | --                                 | 857               | 765 (89.3)        | 92 (10.7)         |         |
| Race                                | --                                 |                   |                   |                   |         |
| White                               | --                                 | 447 (52.2)        | 402 (52.5)        | 45 (48.9)         | 0.510   |
| Black                               | --                                 | 410 (47.8)        | 363 (47.5)        | 47 (51.1)         |         |
| Age, yrs, mean (SD)                 | --                                 | 46.6 (3.0)        | 46.6 (3.0)        | 46.4 (2.8)        | 0.502   |
| Education, yrs, mean (SD)           | 0, 54                              | 15.7 (2.1)        | 15.7 (2.1)        | 15.2 (2.4)        | 0.162   |
|                                     |                                    |                   |                   |                   |         |
| Processing Speed, mean (SD)         | --                                 | 58.3 (11.0)       | 58.2 (11.1)       | 59.9 (7.6)        | 0.272   |
| Working Memory, mean (SD)           | --                                 | 6.7 (2.1)         | 6.7 (2.1)         | 7.0 (2.2)         | 0.196   |
| Cardiovascular Health, mean (SD)    | --                                 | 63.1 (16.2)       | 63.3 (16.1)       | 61.5 (17.4)       | 0.328   |
| Cardiovascular Health, median (IQR) | --                                 | 63.8 (52.5, 75.0) | 63.8 (52.9, 75.6) | 62.3 (50.3, 74.1) | 0.168   |
|                                     |                                    |                   |                   |                   |         |
| Diet score, mean (SD)               | 3, 5                               | 46.2 (28.2)       | 46.5 (28.5)       | 43.8 (25.4)       | 0.400   |
| Physical Activity score, mean (SD)  | --                                 | 45.5 (43.3)       | 45.2 (43.4)       | 47.6 (42.6)       | 0.619   |
| Tobacco score, mean (SD)            | 21, 9                              | 58.9 (37.7)       | 58.5 (37.6)       | 61.7 (38.4)       | 0.445   |
| Sleep score, mean (SD)              | 38, 207                            | 79.0 (24.7)       | 79.5 (24.6)       | 74.6 (26.3)       | 0.171   |
| BMI score, mean (SD)                | 1, 0                               | 58.9 (34.5)       | 59.2 (34.3)       | 56.3 (36.1)       | 0.438   |
| non-HDL score, mean (SD)            | 2, 23                              | 70.6 (29.8)       | 70.4 (29.9)       | 71.6 (28.4)       | 0.735   |
| Glucose score, mean (SD)            | 3, 22                              | 88.4 (22.5)       | 88.6 (22.4)       | 86.6 (23.0)       | 0.430   |
| Blood Pressure score, mean (SD)     | --                                 | 59.2 (33.3)       | 59.3 (33.4)       | 58.0 (32.2)       | 0.728   |
| Financial strain, N (%)             | 10, 54                             | 287 (36.2)        | 275 (36.4)        | 12 (31.6)         | 0.544   |

**Table S2. Race-specific Models for Processing Speed starting at Baseline.**

Black Women

|                  | Model 1                        | Model 2                        |
|------------------|--------------------------------|--------------------------------|
| Effect           | Estimate (95% CI)              | Estimate (95% CI)              |
| Intercept        | <b>-0.128 (-0.218, -0.038)</b> | <b>-0.142 (-0.232, -0.052)</b> |
| Time             | <b>-0.020 (-0.027, -0.012)</b> | <b>-0.017 (-0.024, -0.010)</b> |
| BL Age           | <b>-0.032 (-0.059, -0.004)</b> | -0.021 (-0.050, 0.009)         |
| Education        | <b>0.129 (0.088, 0.170)</b>    | <b>0.131 (0.088, 0.175)</b>    |
| CVH              | 0.021 (-0.066, 0.109)          | -0.026 (-0.118, 0.067)         |
| Age * Time       |                                | -0.002 (-0.005, 0)             |
| Education * Time |                                | -0.001 (-0.004, 0.003)         |
| CVH * Time       |                                | <b>0.012 (0.004, 0.020)</b>    |

White Women

|                  | Model 1                     | Model 2                     |
|------------------|-----------------------------|-----------------------------|
| Effect           | Estimate (95% CI)           | Estimate (95% CI)           |
| Intercept        | <b>0.278 (0.205, 0.351)</b> | <b>0.275 (0.202, 0.349)</b> |
| Time             | -0.001 (-0.008, 0.005)      | 0 (-0.007, 0.007)           |
| BL Age           | -0.019 (-0.041, 0.004)      | -0.013 (-0.036, 0.010)      |
| Education        | <b>0.065 (0.032, 0.098)</b> | <b>0.066 (0.032, 0.100)</b> |
| CVH              | 0.056 (-0.022, 0.133)       | 0.061 (-0.018, 0.141)       |
| Age * Time       |                             | <b>-0.002 (-0.004, 0)</b>   |
| Education * Time |                             | -0.001 (-0.004, 0.003)      |
| CVH * Time       |                             | -0.003 (-0.010, 0.005)      |

CVH = z-score of Life's Essential 8

Time, age at Baseline, education in years; age and education centered

Model 1: Main effects

Model 2: Model 1 plus 2-way interactions

Bolded: significant at  $p < 0.05$

**Table S3. Processing Speed with CVH components, starting at Baseline (Model 3).**

| Component               | Non-HDL                        | BMI                            | Diabetes                       | Blood Pressure                 |
|-------------------------|--------------------------------|--------------------------------|--------------------------------|--------------------------------|
| Effect                  | Estimate (95% CI)              | Estimate (95% CI)              | Estimate (95% CI)              | Estimate (95% CI)              |
| Intercept               | <b>0.290 (0.215, 0.366)</b>    | <b>0.298 (0.221, 0.374)</b>    | <b>0.289 (0.212, 0.366)</b>    | <b>0.289 (0.211, 0.368)</b>    |
| Time                    | -0.002 (-0.008, 0.005)         | -0.002 (-0.009, 0.005)         | -0.002 (-0.009, 0.005)         | -0.001 (-0.008, 0.006)         |
| Race                    | <b>-0.435 (-0.546, -0.325)</b> | <b>-0.429 (-0.541, -0.317)</b> | <b>-0.427 (-0.538, -0.315)</b> | <b>-0.44 (-0.554, -0.326)</b>  |
| Age                     | -0.016 (-0.035, 0.002)         | -0.017 (-0.036, 0.001)         | -0.016 (-0.035, 0.002)         | -0.018 (-0.037, 0.001)         |
| Education               | <b>0.098 (0.071, 0.125)</b>    | <b>0.099 (0.072, 0.126)</b>    | <b>0.098 (0.071, 0.125)</b>    | <b>0.099 (0.072, 0.125)</b>    |
| Component               | 0.03 (-0.048, 0.109)           | -0.029 (-0.106, 0.047)         | 0.017 (-0.077, 0.112)          | 0.003 (-0.079, 0.085)          |
| Race * Time             | <b>-0.017 (-0.026, -0.007)</b> | <b>-0.015 (-0.025, -0.005)</b> | <b>-0.016 (-0.026, -0.006)</b> | <b>-0.015 (-0.025, -0.005)</b> |
| Age * Time              | <b>-0.003 (-0.004, -0.001)</b> | <b>-0.002 (-0.004, -0.001)</b> | <b>-0.003 (-0.004, -0.001)</b> | <b>-0.002 (-0.004, -0.001)</b> |
| Education * Time        | 0 (-0.003, 0.002)              | 0 (-0.003, 0.002)              | 0 (-0.003, 0.002)              | 0 (-0.003, 0.002)              |
| Component * Time        | -0.002 (-0.009, 0.005)         | 0.002 (-0.005, 0.008)          | 0.002 (-0.008, 0.011)          | -0.002 (-0.009, 0.005)         |
| Race * Component        | -0.007 (-0.119, 0.105)         | 0.068 (-0.044, 0.181)          | 0.035 (-0.085, 0.155)          | -0.047 (-0.161, 0.068)         |
| Race * Component * Time | 0.003 (-0.007, 0.012)          | 0.007 (-0.003, 0.017)          | 0.003 (-0.009, 0.014)          | <b>0.012 (0.002, 0.022)</b>    |

Race: Referent is White; Time (years since Baseline), age (years) at Baseline, education in years; age and education centered

Bolded: significant at  $p < 0.05$

CVH components = z-scores of Life's Essential 8 components

**Table S3. Processing Speed with CVH components, starting at Baseline (Model 3), continued.**

| Component               | Sleep                          | Diet                           | Tobacco                        | Physical Activity              |
|-------------------------|--------------------------------|--------------------------------|--------------------------------|--------------------------------|
| Effect                  | Estimate (95% CI)              | Estimate (95% CI)              | Estimate (95% CI)              | Estimate (95% CI)              |
| Intercept               | <b>0.308 (0.223, 0.394)</b>    | <b>0.288 (0.213, 0.364)</b>    | <b>0.287 (0.212, 0.363)</b>    | <b>0.279 (0.202, 0.355)</b>    |
| Time                    | 0.001 (-0.006, 0.008)          | -0.001 (-0.008, 0.006)         | -0.002 (-0.009, 0.004)         | -0.002 (-0.008, 0.005)         |
| Race                    | <b>-0.459 (-0.586, -0.332)</b> | <b>-0.426 (-0.536, -0.316)</b> | <b>-0.419 (-0.529, -0.309)</b> | <b>-0.416 (-0.528, -0.304)</b> |
| Age                     | -0.018 (-0.038, 0.003)         | -0.016 (-0.035, 0.002)         | -0.016 (-0.035, 0.002)         | -0.017 (-0.036, 0.001)         |
| Education               | <b>0.108 (0.078, 0.138)</b>    | <b>0.098 (0.072, 0.125)</b>    | <b>0.099 (0.072, 0.126)</b>    | <b>0.095 (0.068, 0.122)</b>    |
| Component               | 0.013 (-0.083, 0.109)          | -0.012 (-0.086, 0.062)         | 0.046 (-0.032, 0.123)          | 0.058 (-0.016, 0.132)          |
| Race * Time             | <b>-0.020 (-0.030, -0.010)</b> | <b>-0.018 (-0.027, -0.008)</b> | <b>-0.019 (-0.028, -0.009)</b> | <b>-0.016 (-0.025, -0.006)</b> |
| Age * Time              | <b>-0.003 (-0.004, -0.001)</b> | <b>-0.003 (-0.004, -0.001)</b> | <b>-0.003 (-0.005, -0.001)</b> | <b>-0.002 (-0.004, -0.001)</b> |
| Education * Time        | -0.001 (-0.003, 0.002)         | 0 (-0.002, 0.002)              | 0 (-0.002, 0.002)              | 0 (-0.003, 0.002)              |
| Component * Time        | <b>-0.008 (-0.017, 0)</b>      | -0.004 (-0.011, 0.002)         | -0.003 (-0.010, 0.004)         | 0 (-0.007, 0.006)              |
| Race * Component        | -0.065 (-0.193, 0.062)         | 0.030 (-0.079, 0.140)          | <b>-0.121 (-0.232, -0.010)</b> | -0.052 (-0.163, 0.060)         |
| Race * Component * Time | 0.007 (-0.003, 0.018)          | 0.001 (-0.009, 0.011)          | <b>0.012 (0.001, 0.022)</b>    | 0.008 (-0.002, 0.017)          |

Race: Referent is White; Time (years since Baseline), age (years) at Baseline, education in years; age and education centered

Bolded: significant at  $p < 0.05$

CVH components = z-scores of Life's Essential 8 components

Figure S1. Histogram of Life's Essential 8 by Race.

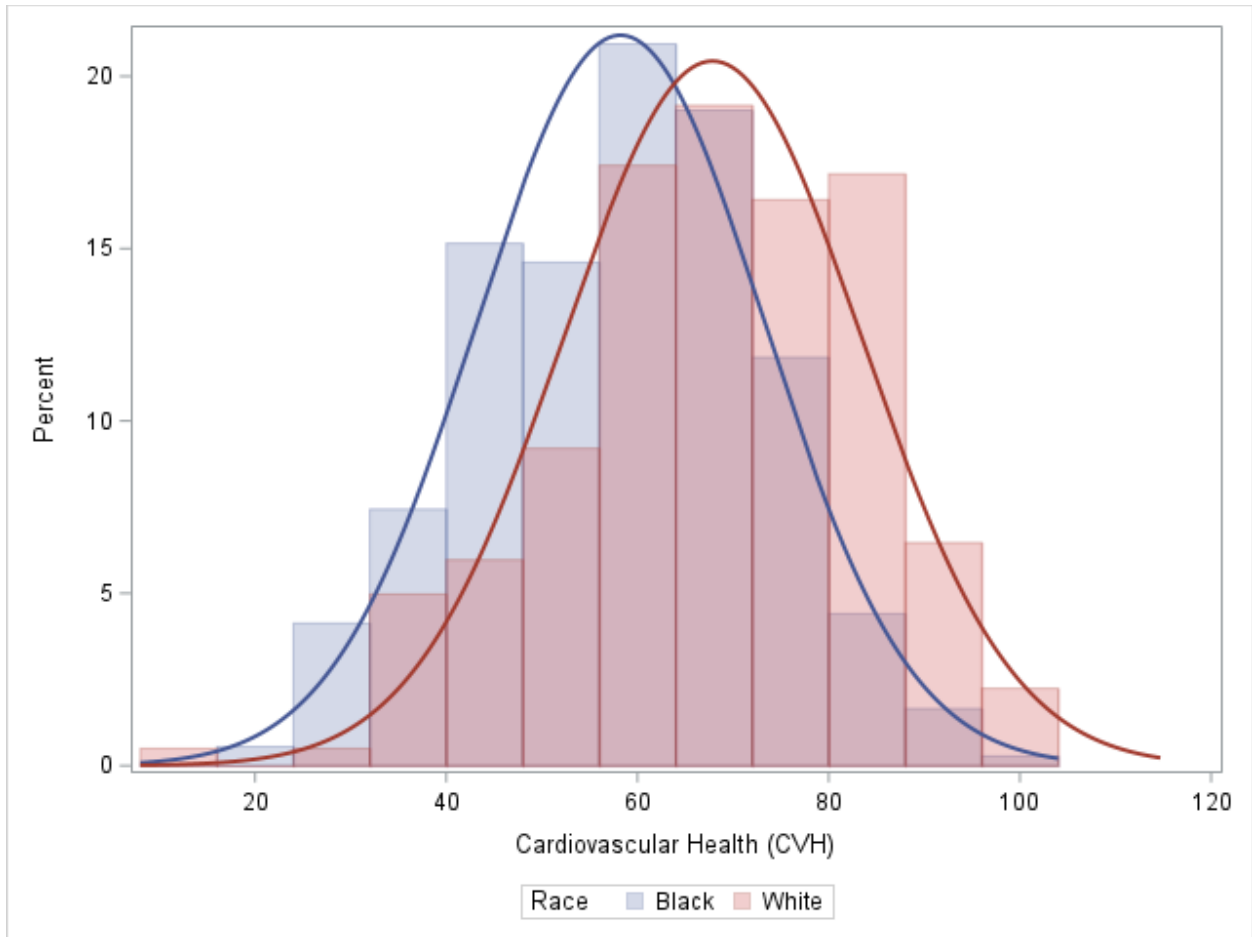

Supplement: JAH3-13-e031619-s001.pdf [file JAH3-13-e031619-s001.pdf]
